# Supplementary figures and images for: On the epidemiology of influenza
Source: Springer Nature journal article supplement (doi:10.1186/1743-422x-5-29), 2008-01-01

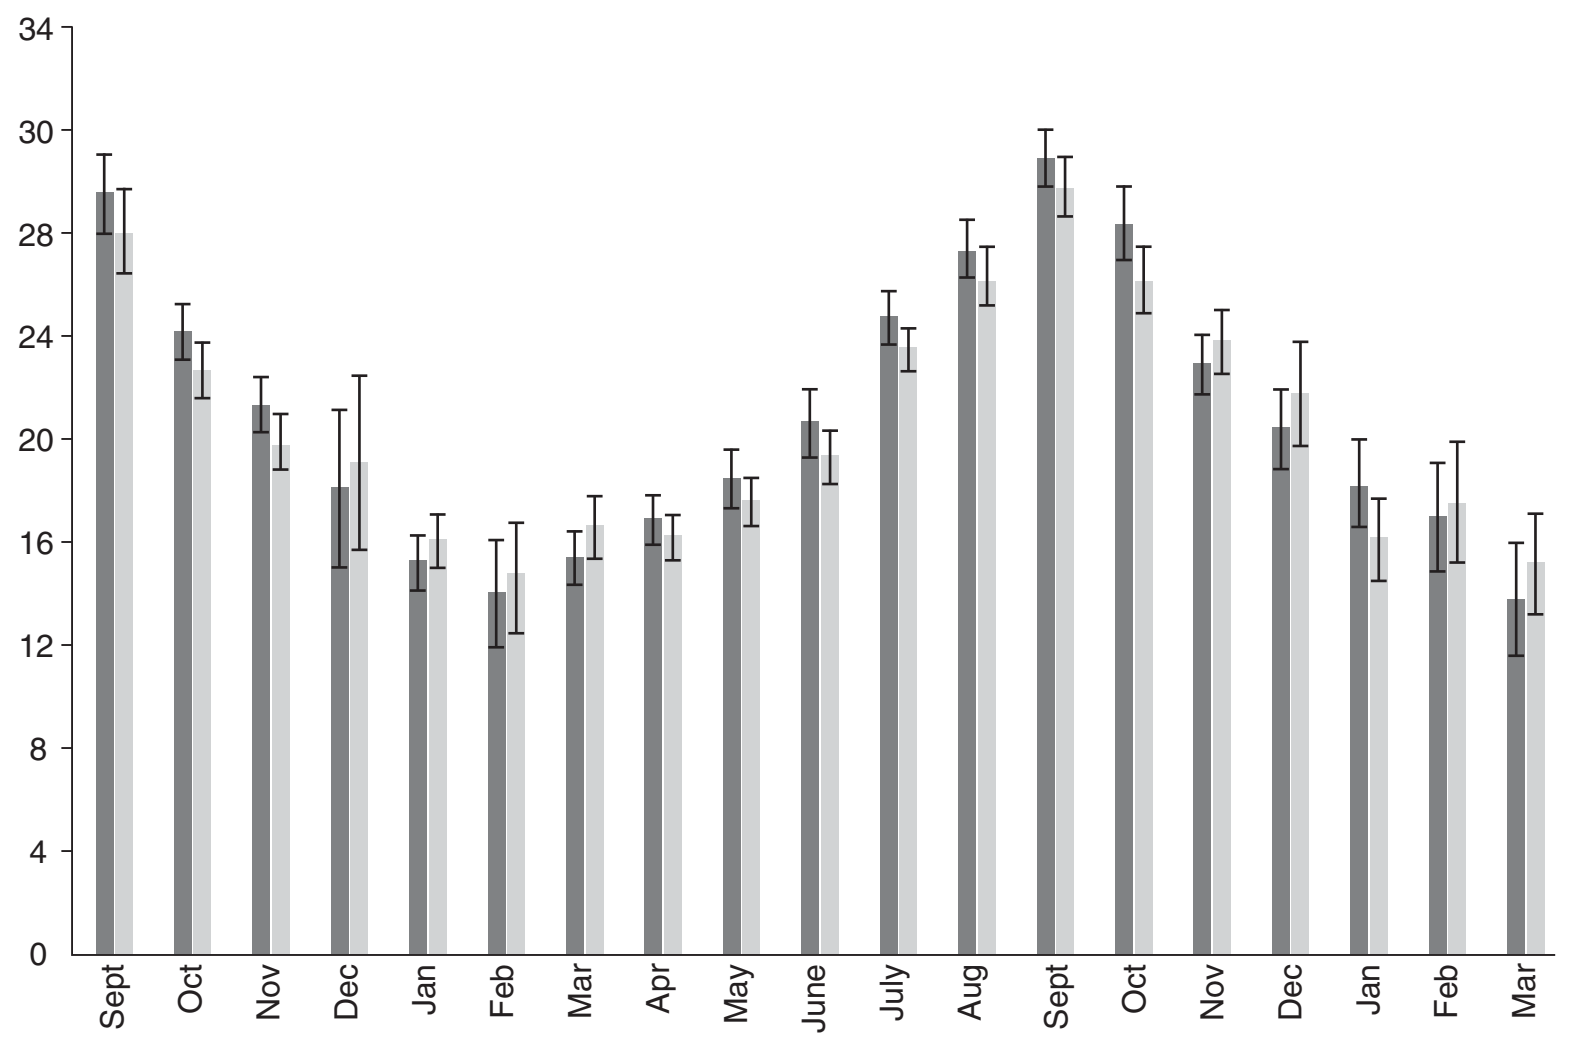

Supplement: 12985_2008_378_MOESM1_ESM.pdf [file 12985_2008_378_MOESM1_ESM.pdf]

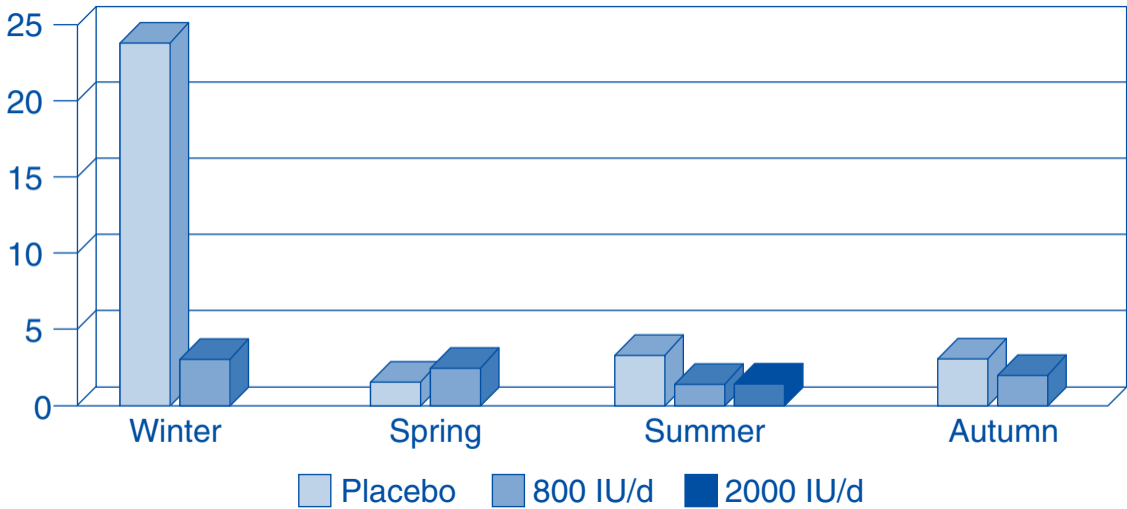

Supplement: 12985_2008_378_MOESM2_ESM.pdf [file 12985_2008_378_MOESM2_ESM.pdf]
